# Supplementary material for: Prophage-triggered membrane vesicle formation through peptidoglycan damage in Bacillus subtilis
Source: PubMed Central journal article supplement (PMC5589764; doi:10.1038/s41467-017-00492-w), 2017-09-07
Supplement: 41467_2017_492_MOESM1_ESM.pdf [file 41467_2017_492_MOESM1_ESM.pdf]

## Description of Supplementary Files

File Name: Supplementary Information

Description: Supplementary Tables, Supplementary Figures and Supplementary References

File Name: Supplementary Movie 1

Description: MVs are released by *B. subtilis* 168 at the onset of the stationary phase. Cell membrane was stained with FM4-64. Dead cells and extracellular DNA are stained with SYTOX green (green).

File Name: Supplementary Movie 2

Description: MV formation in induced *B. subtilis* 168 ( $P_{xyIA}$ -xhlAB-xlyA) cells. Cells were stained with FM4-64 and inoculated on LB agarose pads containing 0.1% xylose and fluorescent dyes and mounted for live cell imaging by CLSM. Membranes were stained with FM4-64 (red), dead cells and extracellular DNA are stained with SYTOX green (green).

File Name: Supplementary Movie 3

Description: Close up image of MV formation in *B. subtilis* 168 ( $P_{xyIA}$ -xhlAB-xlyA). MV formation was induced and observed as described in Supplemental movie 2.

File Name: Supplementary Movie 4

Description: ECT imaging of MV formation. Shown are different 2D slices and a model of the cell shown in Fig. 3d. Peptidoglycan, white; inner membrane, orange.

File Name: Supplementary Movie 5

Description: Cell death triggers MV release in neighboring cells. *B. subtilis* 168 cells were stained with FM4-64 and then incubated for 5h at 37 °C on an LB agarose pad containing SYTOX green (green) and FM4-64 (red). The fate of cells was monitored by CLSM.

File Name: Peer Review File

Supplementary Table 1: Strains and plasmids used in this study

| Name                                                      | Genotype or description                                                                                                                                                                                          | Source or reference |
|-----------------------------------------------------------|------------------------------------------------------------------------------------------------------------------------------------------------------------------------------------------------------------------|---------------------|
| <b><i>B. subtilis</i> strains</b>                         |                                                                                                                                                                                                                  |                     |
| 168                                                       | Wild-type <i>trpC2</i>                                                                                                                                                                                           | Laboratory stock    |
| MS                                                        | <i>SPβ PBSX skin λPr-neo::Δupp trpC2</i>                                                                                                                                                                         | NBRP collection     |
| MGB469                                                    | <i>SPβ PBSX pro1-6 skin pks pps</i>                                                                                                                                                                              | NBRP collection     |
| $\Delta blyA$ - <i>bhlAB</i>                              | <i>trpC2 blyA-bhlA-bhlB::erm</i>                                                                                                                                                                                 | This study          |
| $\Delta xhlAB$ - <i>xlyA</i>                              | <i>trpC2 xhlA-xhlB-xlyA::spc</i>                                                                                                                                                                                 | This study          |
| $\Delta blyA$ - <i>bhlAB</i> $\Delta xhlAB$ - <i>xlyA</i> | <i>trpC2 blyA-bhlA-bhlB::erm</i><br><i>xhlA-xhlB-xlyA::spc</i>                                                                                                                                                   | This study          |
| 168 ( $P_{xyIA}$ )                                        | <i>trpC2 amyE::xyIR, P<sub>xyIA</sub>, cm</i>                                                                                                                                                                    | This study          |
| 168 ( $P_{xyIA}$ - <i>blyA</i> - <i>bhlAB</i> )           | <i>trpC2 amyE::xyIR, P<sub>xyIA</sub>-blyA-bhlA-bhlB, cm</i>                                                                                                                                                     | This study          |
| 168 ( $P_{xyIA}$ - <i>xhlAB</i> - <i>xlyA</i> )           | <i>trpC2 amyE::xyIR, P<sub>xyIA</sub>-xhlA-xhlB-xlyA, cm</i>                                                                                                                                                     | This study          |
| 168 ( $P_{xyIA}$ - <i>xhlB</i> - <i>xlyA</i> )            | <i>trpC2 amyE::xyIR, P<sub>xyIA</sub>-xhlB-xlyA, cm</i>                                                                                                                                                          | This study          |
| 168 ( $P_{xyIA}$ - <i>xlyA</i> )                          | <i>trpC2 amyE::xyIR, P<sub>xyIA</sub>-xlyA, cm</i>                                                                                                                                                               | This study          |
| $\Delta recA$                                             | <i>trpC2 recA::cm</i>                                                                                                                                                                                            | This study          |
| <i>amyE::recA</i>                                         | <i>trpC2 amyE::recA, kan</i>                                                                                                                                                                                     | This study          |
| <i>amyE::kan</i>                                          | <i>trpC2 amyE::kan</i>                                                                                                                                                                                           | This study          |
| $\Delta recA$ <i>amyE::recA</i>                           | <i>trpC2 recA::cm amyE::recA, kan</i>                                                                                                                                                                            | This study          |
| $\Delta recA$ <i>amyE::kan</i>                            | <i>trpC2 recA::cm amyE::kan</i>                                                                                                                                                                                  | This study          |
| $\Delta ponA$                                             | <i>trpC2 ponA::kan</i>                                                                                                                                                                                           | This study          |
| $\Delta ponA$ ( $P_{xyIA}$ - <i>xhlAB</i> - <i>xlyA</i> ) | <i>xhlAB-xlyA</i> inducible strain of $\Delta ponA$                                                                                                                                                              | This study          |
| TAY3000                                                   | <i>trpC2 lys1 aprEΔ3 nprE18 nprR2 amyE::kan</i>                                                                                                                                                                  | 1                   |
| TMO310                                                    | <i>trpC2 aprE::lacI Pspac-mazF, spec</i>                                                                                                                                                                         | 2                   |
| <b><i>E. coli</i> strains</b>                             |                                                                                                                                                                                                                  |                     |
| JM109                                                     | <i>recA1 endA1 gyrA96 thi-1 hsdR17(r<sub>K</sub><sup>-</sup> m<sub>K</sub><sup>+</sup>) e14<sup>-</sup> (mcr<sup>A</sup>) supE44 relA1 Δ(lac-proAB) F' [traD36 proAB<sup>+</sup> lac I<sup>+</sup> lacZΔM15]</i> | Takara Bio          |

|       |                                                                                               |                             |
|-------|-----------------------------------------------------------------------------------------------|-----------------------------|
| Mach1 | <i>F-</i> $\Phi 80lacZ\Delta M15 \Delta lacX74 hsdR(rK-, mK+)$<br><i>ΔrecA1398 endA1 tonA</i> | Thermo Fisher<br>Scientific |
|-------|-----------------------------------------------------------------------------------------------|-----------------------------|

**Plasmid**

|                                           |                                                                    |            |
|-------------------------------------------|--------------------------------------------------------------------|------------|
| pMutinNC                                  | Integration vector, <i>amp</i> , <i>erm</i>                        | 3          |
| pDH88                                     | Integration vector, <i>amp</i> , <i>cat</i>                        | 4          |
| pEGFP                                     | Plasmid harboring <i>egfp</i>                                      | Clontech   |
| pZsGreen                                  | Plasmid harboring <i>zsGreen</i>                                   | Clontech   |
| pHY300PLK                                 | <i>E. coli-B. subtilis</i> shuttle vector, <i>amp</i> , <i>tet</i> | Takara Bio |
| pHY300-Pveg- <i>egfp</i> -term            | <i>Pveg-egfp</i> in pHY300PLK                                      | This study |
| pHY300-P <sub>L</sub> - <i>egfp</i> -term | <i>P<sub>L</sub>-egfp</i> in pHY300PLK                             | This study |
| pHY300- <i>egfp</i> -term                 | Promoterless <i>egfp</i> in pHY300PLK                              | This study |
| pHY300-Pveg-ZsGreen-term                  | <i>Pveg-zsGreen</i> in pHY300PLK                                   | This study |
| pHY300-P <sub>L</sub> -ZsGreen-term       | <i>P<sub>L</sub>-zsGreen</i> in pHY300PLK                          | This study |
| pHY300-ZsGreen-term                       | Promoterless <i>zsGreen</i> in pHY300PLK                           | This study |

---

Note: NBRP (National BioResource Project, Japan)

Supplementary Table 2: Primers used in this study

| Primer ID | Primer sequence (5' to 3')                |
|-----------|-------------------------------------------|
| TYP1      | TTCAAAACCTCTTTACTGCCGTTATTCGC             |
| TYP2      | GGAGTGTCAGAATGTTTGCAAAACGATTC             |
| TYP3      | CACGTAATCAAAGCCAGGCTGATTCTGACC            |
| TYP4      | TCAATGGGGAAGAGAACCGCTTAAGCCC              |
| TYP7      | GGCCGGATCCAAGAGTTTGTAGAAACGCAA            |
| TYP8      | GGCCGAATTCCGATAAACCCAGCGAACCAT            |
| TYP20     | GGCCGAATTCCGAGTGCAACTAAGTTTGAAA           |
| TYP57     | AATACGCTCCACTTCATAACATGG                  |
| TYP58     | ACTGTTGAATGTGCACAAGCAG                    |
| TYP59     | TCTCTTTCTTTGGCACAATGGCTAG                 |
| TYP60     | CACTCCACAATATTGAACACGTCC                  |
| TYP61     | GAAATTAAGGAGATGTTTTTCTAGCACAAAAGAAAAACG   |
| TYP62     | CGTTTTTCTTTGTGCTAGAAAAACATCTCCTTAATTC     |
| TYP63     | TTGCGTTTCTACAACTCTTAAAAACAATTACATAACTGC   |
| TYP64     | GCAGTTATGTAATTGTTTTAAGAGTTTGTAGAAACGCAA   |
| TYP65     | GGGAATCTTCAGCAATCTGAGTTTG                 |
| TYP66     | GCAGCAGTTAATGTTCGCAGCAGGC                 |
| TYP67     | TGACGTCTGACAGCATTGTCACG                   |
| TYP68     | AATACGGAAAAGTGGTTCTCATCC                  |
| TYP69     | ATGTGAAGGAGGAGTGAGAGCAAAAATTATATGGAGATCT  |
| TYP70     | AGATCTCCATATAATTTTTGCTCTCACTCCTCCTCACAT   |
| TYP71     | ACTTTAATTTAGTGAAGCTTCAAAGACCATAAAAATCCC   |
| TYP72     | GGGATTTTTATGGTCTTTGAAAGCTTCACTAAATTAAGT   |
| TYP81     | TGCGTTTCTACAACTCTTTGCTTCAGAAATACTCCTAGA   |
| TYP82     | CTAGGAGTATTTCTGAAGCAAAGAGTTTGTAGAAACGCAA  |
| TYP83     | TTGAATGAATTTATTTTTAAAAATAACCAAAAAGCAAGG   |
| TYP84     | CCTTGCTTTTTGGTTATTTTTAAAAATAAATTCATTCAA   |
| TYP85     | TTGAATGAATTTATTTTTAAAATTAGAAATTAAGGAGATG  |
| TYP86     | CATCTCCTTAATTTCTAATTTTTAAAAATAAATTCATTCAA |

TYP87 AAGAGAACTTGTTTAAATAGAAAATAACCAAAAAGCAAGG  
TYP88 CCTTGCTTTTTGGTTATTTTCTATTTAAACAAGTTCTCTT  
TYP89 TTGAATGAATTTATTTTAAATCTGCATGTGAAGGAGGAGT  
TYP90 ACTCCTCCTTCACATGCAGATTA AAAATAAATTCATTCAA  
TYP91 TCGCAGCGCAATTAAGCTGAAAAATAACCAAAAAGCAAGG  
TYP92 CCTTGCTTTTTGGTTATTTTTCAGCTTAATTGCGCTGCGA  
TYP93 TTGAATGAATTTATTTTAAAGCTGCAGCATTAAAGGGGGA  
TYP94 TCCCCCTTAAATGCTGCAGCTTA AAAATAAATTCATTCAA  
TYP101 TTGAATGAATTTATTTTAAATCTGACGAAATAAGGAGAGA  
TYP102 TCTCTCCTTATTTGTCAGATTA AAAATAAATTCATTCAA  
TYP105 TAATGTCACCTAACCTGCCCGTTTAGGCTGGGCGGTGATA  
TYP106 TATCACCGCCAGCCTAACCGGGCAGGTTAGTGACATTA  
TYP107 GGCCGAATTCGAAAATTGGATAAAGTGGGA  
TYP108 TAGCGGTGCCTCAAAATTATTTGC  
TYP109 TTTCTGCGGCAGAAAGCTTTACC  
TYP110 GTAGTGTTTACGGTCAGCATAGCC  
TYP111 AATACGTGCTTACCGGATCACTTG  
TYP112 ATAAAGGAGGAAAAATAGAGAAAATTGGATAAAGTGGGA  
TYP113 TCCCACTTTATCCAATTTTCTCTATTTTTTCTCCTTTAT  
TYP114 TAATGTCACCTAACCTGCCCAAATAAAAATAAGTTTCAAAT  
TYP115 ATTTGAACTTATTTTATTTGGGGCAGGTTAGTGACATTA  
TYP116 GGCCGGATCCAGAAAACGCGGCGCTAAATA  
TYP117 GGCCGAATTCGAATATTTTTATCATTTTTTTGCAAATAC  
TYP118 GGCCGAATTCTCGTTTTTAAAACCCCTGCC  
TYP119 ATAGTGTTGGCCAGCAAGAGGCGA  
TYP120 CTTGCTGGCCAACACTATTTTGAATGCGTACAGACATTCTAAGC  
TYP121 CTCGCCCTTGCTCACCATTGCATCCACCTCACTACATTTATTGTAC  
TYP122 CCTTGCTTTTTGGTTATTTTTTACTTGTACAGCTCGTCCA  
TYP123 TGGACGAGCTGTACAAGTAAAAATAACCAAAAAGCAAGG  
TYP124 GGCCGGATCCGAGTGCAACTAAGTTTGAAAAATCAG  
TYP125 ATGGTAGCAAGGGCGAGGAGC  
TYP126 CTTGCTGGCCAACACTATAAGCTTGTACATACGTTTGCCAC

|        |                                                    |
|--------|----------------------------------------------------|
| TYP127 | TCACCACCTTTTCCCTATATAAAATTAGAAGCTTTTGACGTAATACAGGC |
| TYP128 | GCTGGCCAACACTATATGGTGAGCAAGGGCGAGGAGC              |
| TYP129 | GGAAAAGGTGGTGAACACTACTATGGCTCAGTCAAAGCACGG         |
| TYP130 | CCTTGCTTTTTGGTTATTTTTTCAGGGCAATGCAGATCCGG          |
| TYP131 | CTTTTTGGTTATTTTTTCAGGGCAATGCAGATCCGG               |
| TYP132 | AGGTGGTGAACACTACTATGACCATGATTACGCCAAGCTTGC         |
| TYP133 | CGGGTTTCGCCACCACTGATTTGAGCGTCA                     |
| TYP134 | AACATTCTCAAAGGGATTTCTAAATCGTTA                     |
| TYP135 | CACCTTTTCCCTATATAAAATACATTTATTGTACAACACG           |
| TYP136 | CGTGTTGTACAATAAATGTATTTTATATAGGGAAAAGGTG           |
| TYP137 | CACCTTTTCCCTATATAAAATAGTGTGGCCAGCAAGAG             |
| TYP138 | CTCTTGCTGGCCAACACTATTTTTATATAGGGAAAAGGTG           |
| TAY139 | AGTAATCGCGGAATGACCCTCG                             |
| TAY140 | CCTCGAAGATGACTTAAACGAAAACG                         |
| TAY141 | GTGTTGGCTTCCCTATGAGCAATAC                          |
| TAY142 | GTTCCCTCGGATATGAAGAAAACC                           |
| TAY143 | TAACGAAAGGTTGAGATGTTTCGATAAAACCCAGCGAACCAT         |
| TAY144 | ATGGTTCGCTGGGTTTATCGAACATCTCAACCTTTCGTTA           |
| TAY145 | TTTAGATGTCTAAAAAGCTTACAAAAAAGCCGTCACCTTT           |
| TAY146 | AAAGGTGACGGCTTTTTTGTAAGCTTTTTAGACATCTAAA           |

---

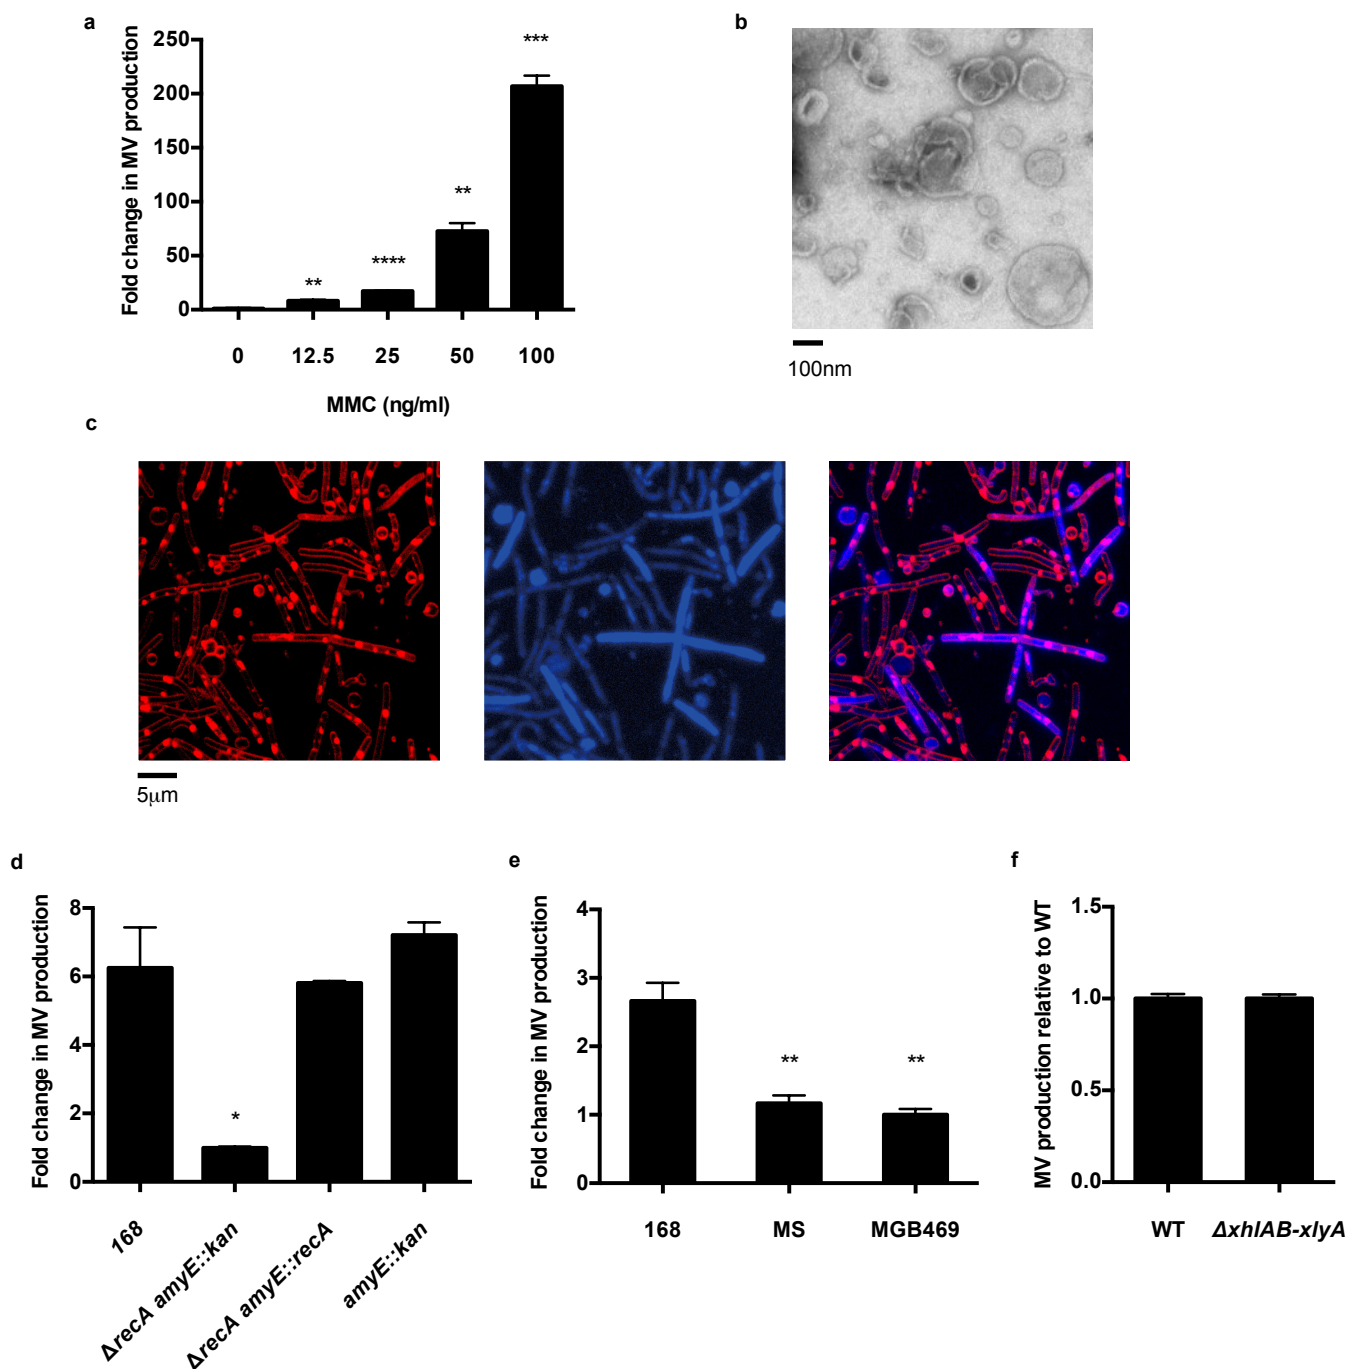

### Supplementary Figure 1. MV production in *B. subtilis* is induced by MMC.

(a) MV production relative to the uninduced control is shown. MMC was added at the concentrations indicated in the figure when cultures reached an OD<sub>600</sub> of 0.3-0.4. The cultures were incubated for 4h before MVs were quantified.  $n=3$ ; mean±s.d. \*\* $P < 0.01$ , \*\*\* $P < 0.001$ , \*\*\*\* $P < 0.0001$  (unpaired t-test with Welch's correction). (b) TEM images of MVs purified from the supernatant of *B. subtilis* cultures treated with MMC. (c) CLSM images of *B. subtilis* cells treated with 5ng/mL MMC. Cells were stained with the membrane stain FM4-64 (red) and the DNA stain DAPI (blue). (d and e) Effect of *recA* and prophages on MMC-induced MV production relative to the untreated control is shown. The *recA* mutant was complemented by insertion of the wild-type allele in the *amyE* gene region. An *amyE*::kan insertion mutant was used as a control. Strain MS lacks SPβ, PBSX and SKIN prophage sequences. MGB469 lacks all prophage sequences except *proΦ 7*.  $n=3$ ; mean±s.d. \* $P < 0.05$ , \*\* $P < 0.01$  (unpaired t-test with Welch's correction). (f) MV production relative to the wild-type under MMC non-added conditions. Cells were cultured in LB medium for 24h at 37 °C before MVs were quantified.  $n=3$ ; mean±s.d.

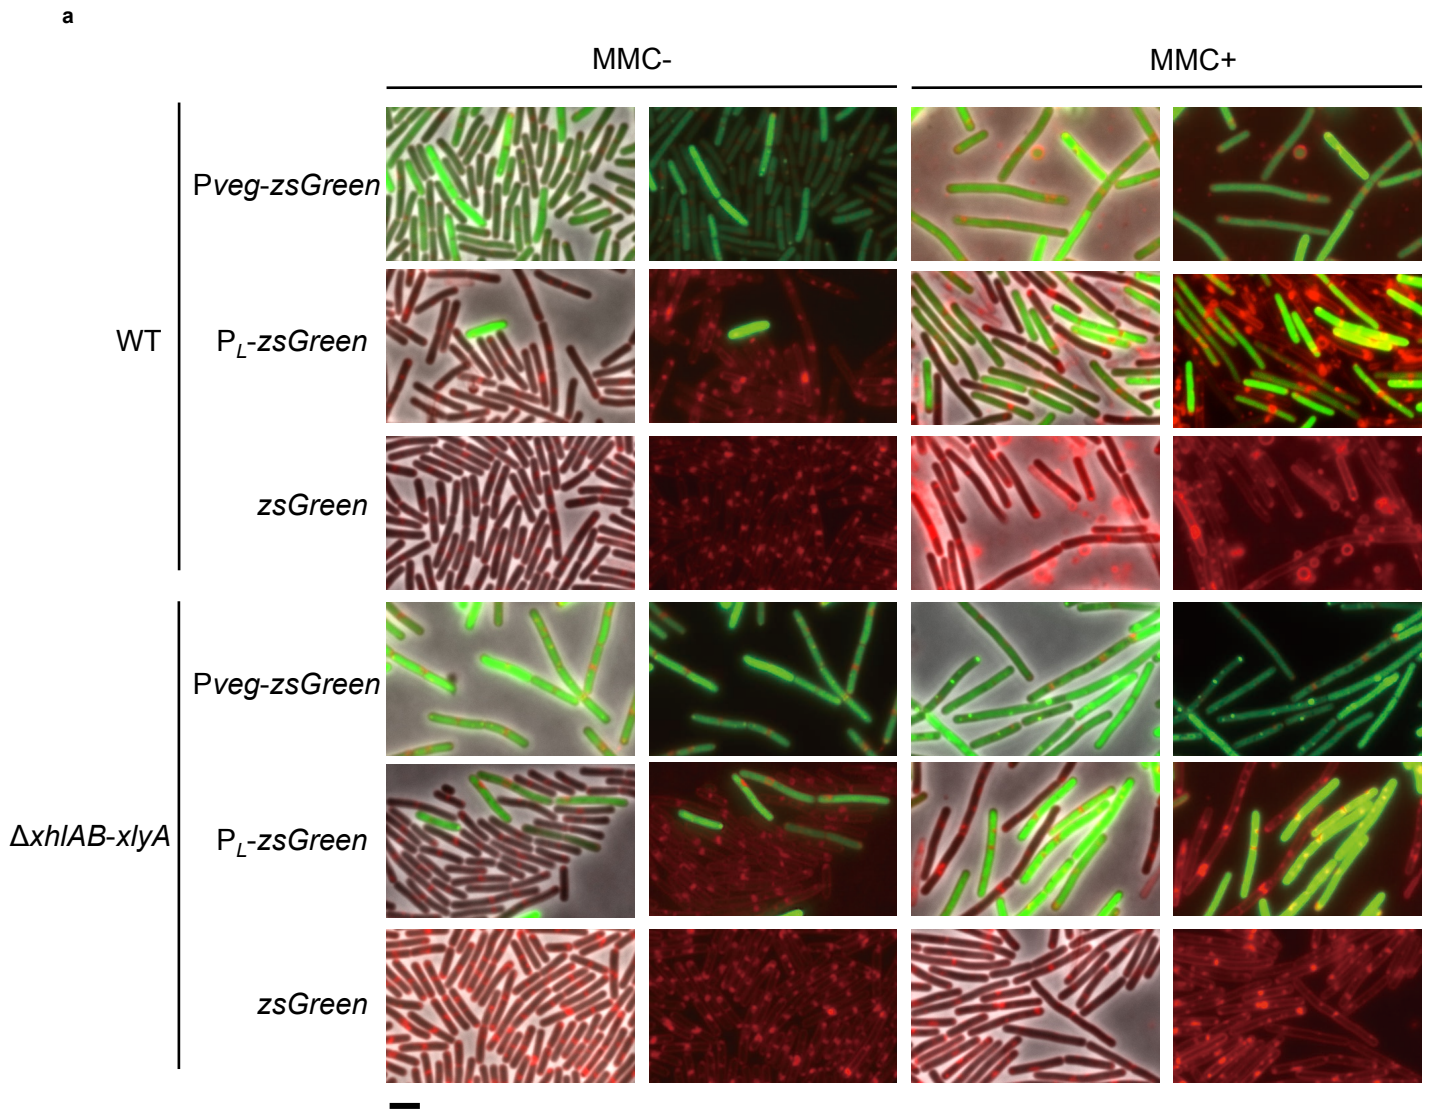

b

| Strain              | Treatment | % of cells with fluorescence (n) |                              |                |
|---------------------|-----------|----------------------------------|------------------------------|----------------|
|                     |           | <i>Pveg-zsGreen</i>              | <i>P<sub>L</sub>-zsGreen</i> | <i>zsGreen</i> |
| WT                  | Untreated | 99.8 ± 0.10                      | 2.45 ± 0.32                  | 0.03 ± 0.01    |
|                     | MMC       | 99.8 ± 0.05                      | 83.0 ± 2.03                  | 0.08 ± 0.03    |
| $\Delta xhIAB-xlyA$ | Untreated | 100 ± 0.03                       | 5.22 ± 0.50                  | 0.06 ± 0.02    |
|                     | MMC       | 99.7 ± 0.05                      | 83.8 ± 1.16                  | 0.13 ± 0.02    |

**Supplementary Figure 2. The PBSX phage is expressed in a subpopulation.**

(a) Activity of the  $P_L$  late operon promoter of PBSX. The *Pveg* promoter was used as a positive control and *zsGreen*, which lacked a promoter, was used as a negative control. Following addition of MMC, cultures were incubated for 1h before pictures were taken. Panels show phase contrast images merged with ZsGreen (green) and the membrane strain FM4-64 (red) (columns 1 and 3), and FM4-64 merged with ZsGreen (columns 2 and 4). The merged image of  $P_L$ -*zsGreen* and FM4-64 is also shown in Fig. 2c. Bar, 5 $\mu$ m. (b) Proportion of cells expressing transcriptional fusions of the respective promoter regions. Fluorescence of each cell was measured using a flow cytometer.  $n=3$ ; mean $\pm$ s.e. (unpaired t-test with Welch's correction).



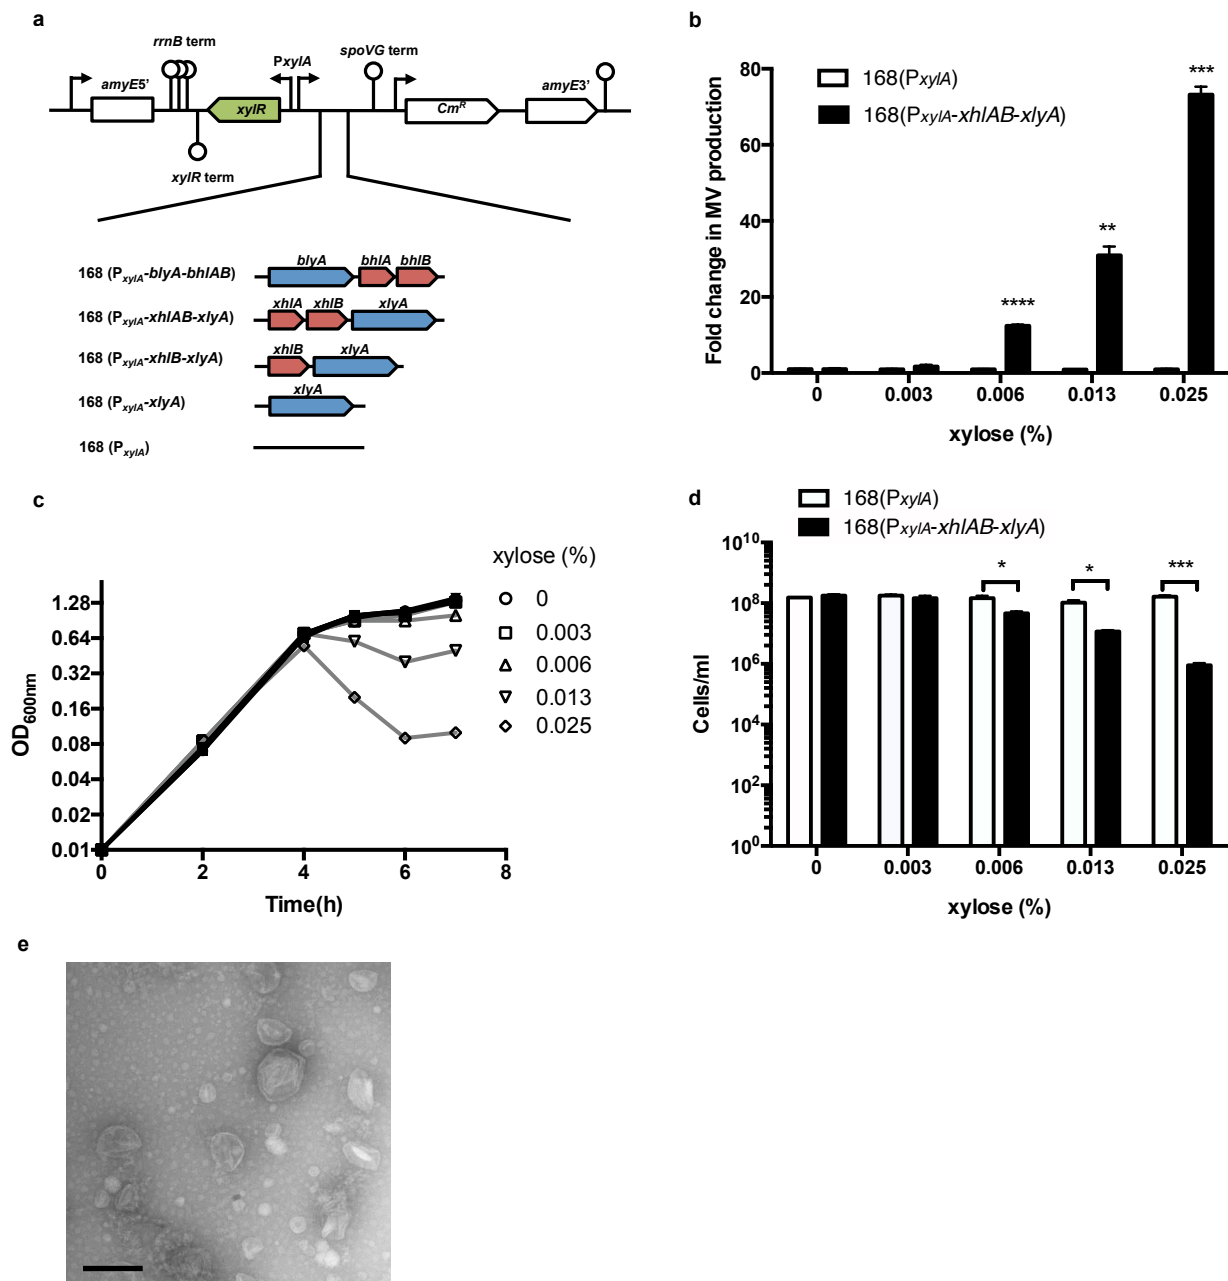

**Supplementary Figure 3. The PBSX holin-endolysin system stimulate MV biogenesis in *B. subtilis* 168.** (a) Construction of holin-endolysin conditional strains. Different genes of the PBSX holin-endolysin locus were placed under the control of the xylose-inducible promoter P<sub>xyIA</sub> and the resulting gene cassettes were inserted into the amyE locus. The control strain 168 (P<sub>xyIA</sub>) has no gene downstream of the xylA promoter. (b) MV production is stimulated by the expression of xhlAB-xlyA. Gene expression was induced by adding various amounts of xylose to cultures of strain 168 (P<sub>xyIA</sub>-xhlAB-xlyA). MV production relative to the uninduced control is shown. n=3; mean±s.d. \*\*P < 0.01, \*\*\*P < 0.001, \*\*\*\*P < 0.0001 (unpaired t-test with Welch's correction). MV production is not induced by xylose in the control strain 168 (P<sub>xyIA</sub>). (c and d) Growth curve and CFUs of the xhlAB-xlyA inducible strain 168 (P<sub>xyIA</sub>-xhlAB-xlyA) and the control strain 168 (P<sub>xyIA</sub>). The mean of two independent assays are shown for the growth curve. Black lines indicate the control strain 168 (P<sub>xyIA</sub>) and grey lines indicate strain 168 (P<sub>xyIA</sub>-xhlAB-xlyA). CFUs were determined after 7h (n=3; mean±s.e.m. \*P < 0.05, \*\*\*P < 0.001 (unpaired t-test)). (e) TEM image of MVs purified from the supernatant of an induced *B. subtilis* 168 (P<sub>xyIA</sub>-xhlAB-xlyA) culture. Bar, 500nm.

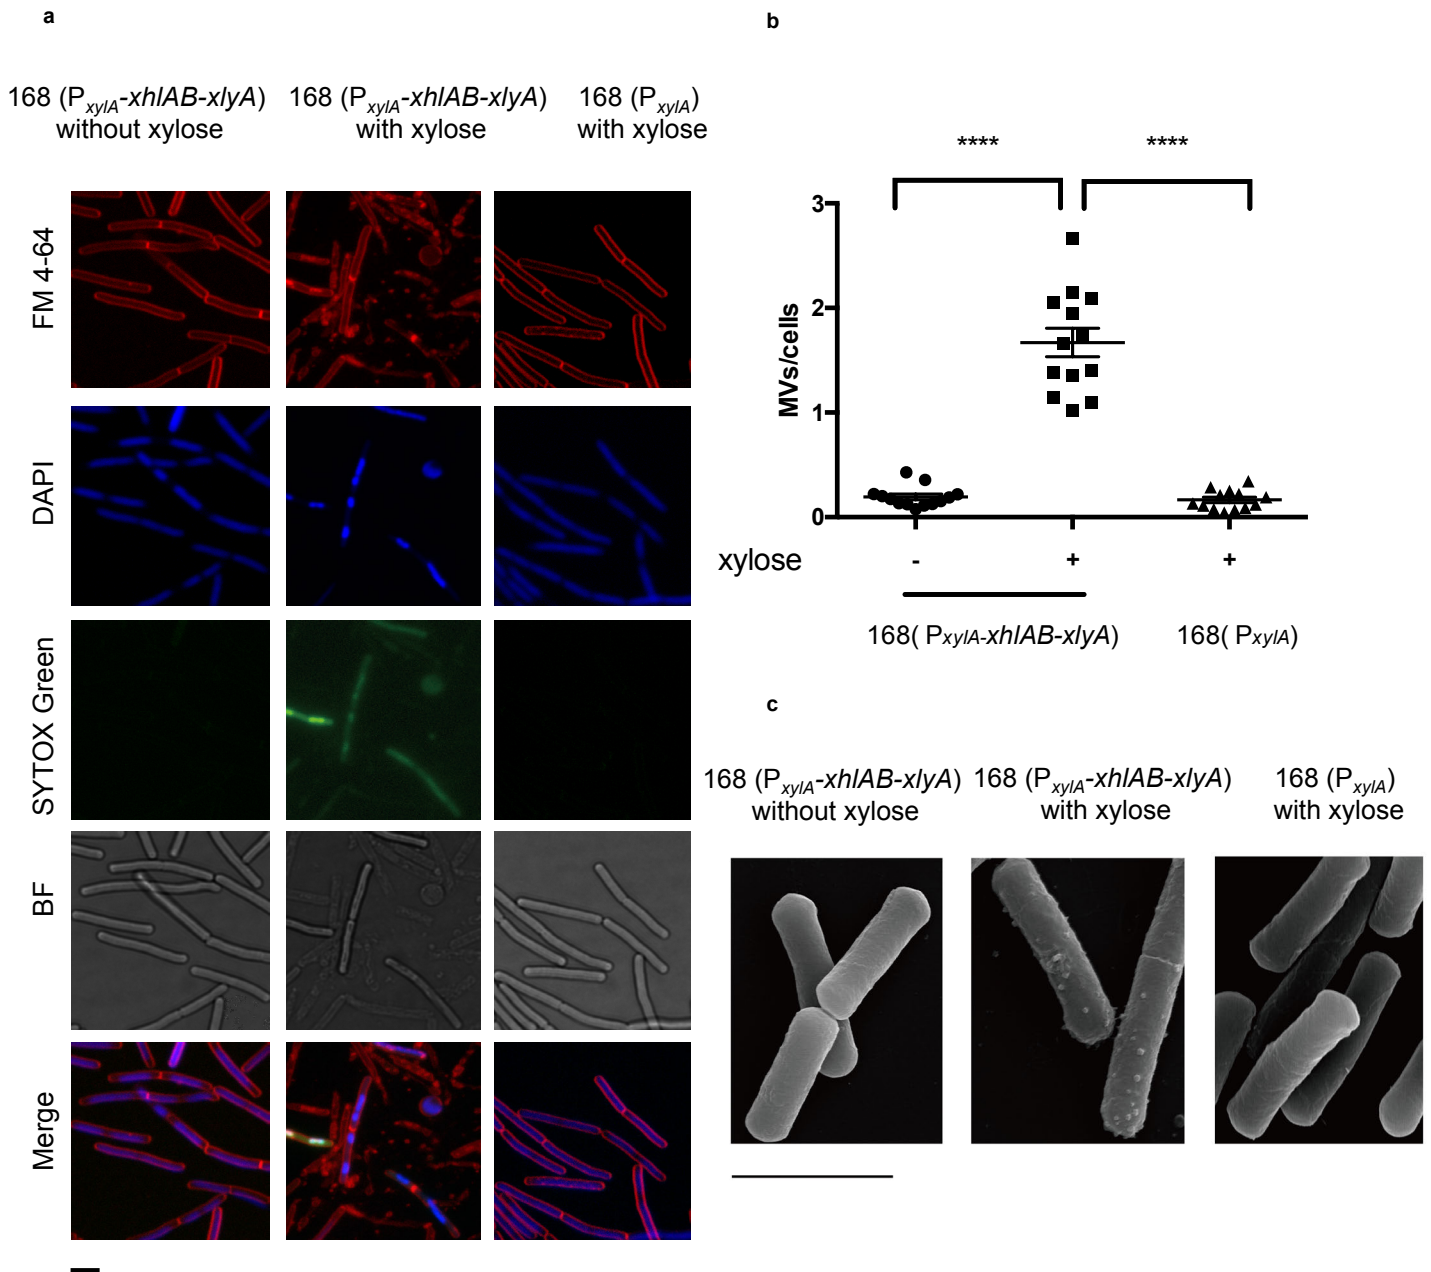

**Supplementary Figure 4. MV production is induced by expression of the *xhIAB-xIyA* genes. (a)** CLSM images of induced and uninduced 168 ( $P_{xyIA}$ -*xhIAB-xIyA*) cells, and the control strain 168 ( $P_{xyIA}$ ). Membranes were stained with FM4-64 (red), DNA with DAPI (blue) and dead cells with SYTOX green (green). Bar, 5 $\mu$ m. **(b)** Quantification of MV-producing cells after staining of samples with FM4-64 (red). \*\*\*\* $P < 0.0001$  (unpaired t-test with Welch's correction).  $n=13$ ; mean $\pm$ s.e.m. **(c)** SEM images of the same samples. Bar, 2 $\mu$ m.

a

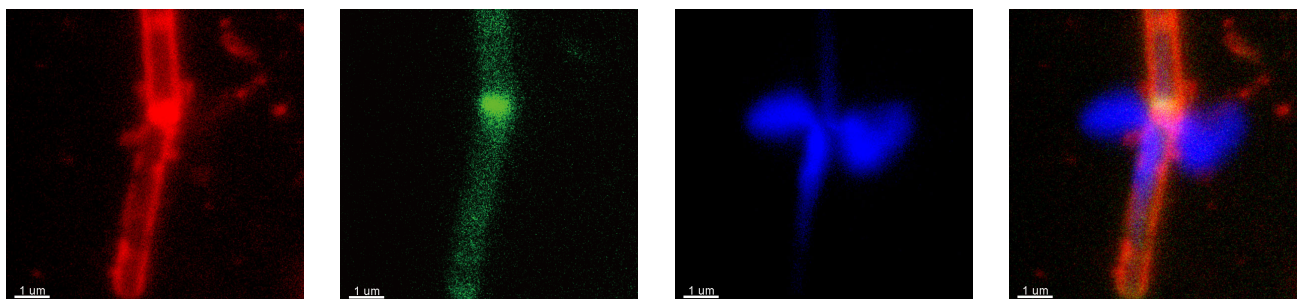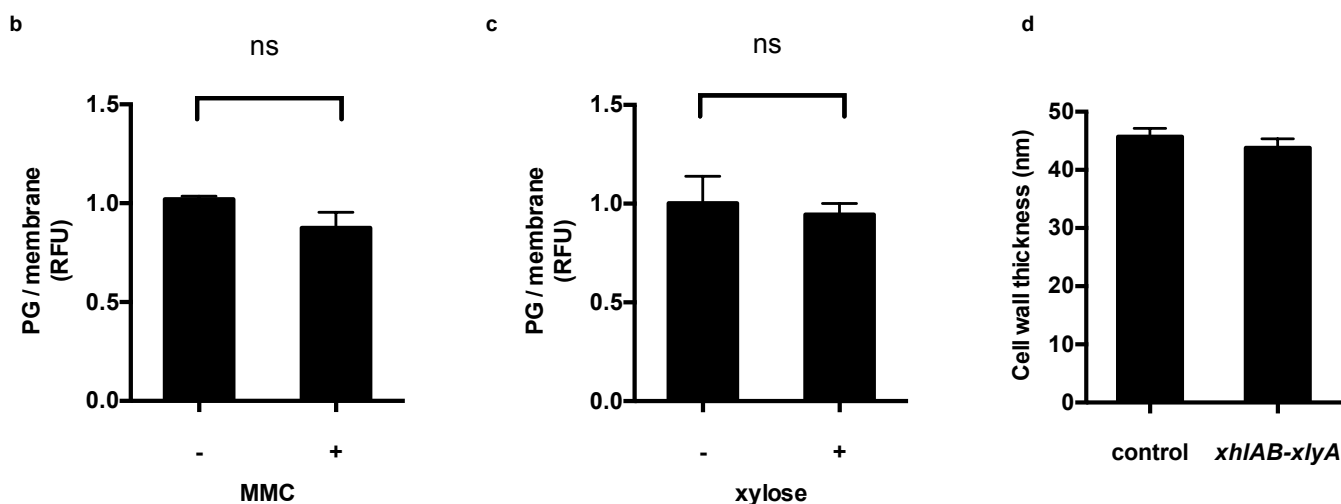

**Supplementary Figure 5. PG is only partially degraded by the XhIAB-XlyA holin-endolysin system.** (a) CLSM images of induced 168 ( $P_{xylA}$ -*xhIAB-xlyA*) cells. Membranes are shown in red, PG in green and DNA in blue. Bar, 1  $\mu$ m. (b and c) Amount of PG relative to the amount of membrane material in induced and uninduced cultures. MV production was induced either by adding MMC to wild-type (WT) cultures (b) or by adding xylose to strain 168 ( $P_{xylA}$ -*xhIAB-xlyA*) (c). Cells were harvested and washed twice in PBS before FDL and FM4-64 fluorescence was quantified.  $n=3$ ; mean  $\pm$  s.d. (unpaired t-test with Welch's correction). (d) The overall thickness of the cell wall remains unchanged when the holin-endolysin system is induced. Cell wall thickness was measured using the thin section TEM images of induced *B. subtilis* 168 ( $P_{xylA}$ -*xhIAB-xlyA*) and the control strain 168 ( $P_{xylA}$ ).  $n=30$ ; mean  $\pm$  s.e.m.

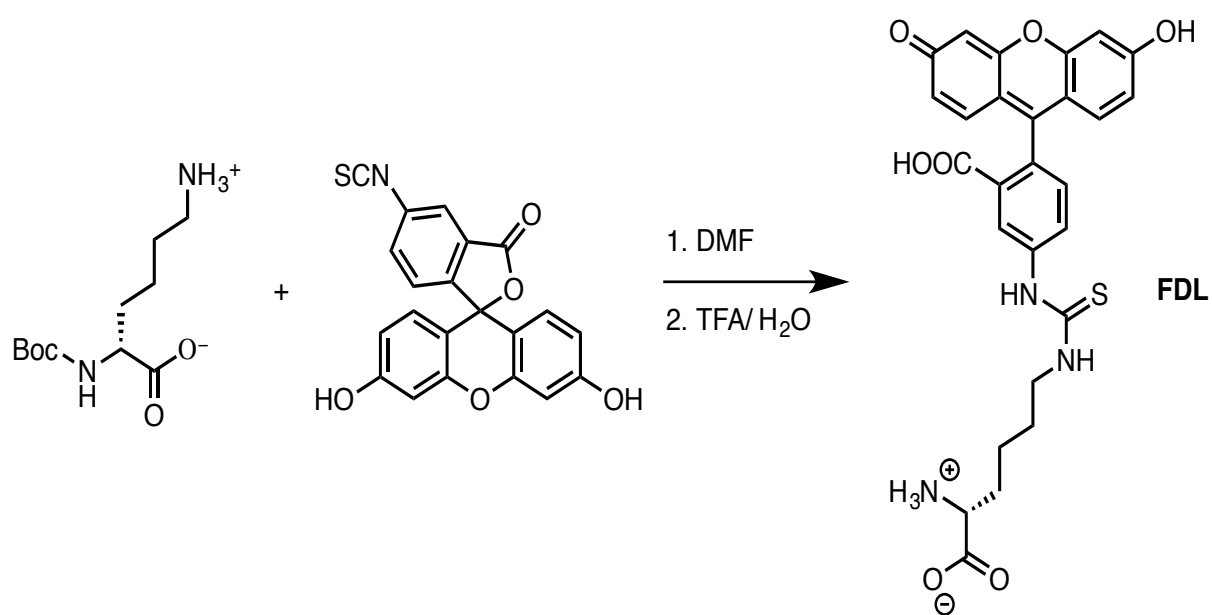

**Supplementary Figure 6. Procedure for the preparation of FDL.** The details are given in the method section of the manuscript.

## Supplementary References

- 1 Yamamoto, T. *et al.* SP10 infectivity is aborted after bacteriophage SP10 infection induces nonA transcription on the prophage SPbeta region of the *Bacillus subtilis* genome. *J. Bacteriol.* **196**, 693-706, doi:10.1128/JB.01240-13 (2014).
- 2 Morimoto, T., Ara, K., Ozaki, K. & Ogasawara, N. A new simple method to introduce marker-free deletions in the *Bacillus subtilis* genome. *Genes Genet. Syst.* **84**, 315-318 (2009).
- 3 Morimoto, T. *et al.* Six GTP-binding proteins of the Era/Obg family are essential for cell growth in *Bacillus subtilis*. *Microbiology* **148**, 3539-3552, doi:10.1099/00221287-148-11-3539 (2002).
- 4 Henner, D. J. Inducible expression of regulatory genes in *Bacillus subtilis*. *Methods Enzymol.* **185**, 223-228 (1990).
